# Supplementary material
Source: PubMed Central journal article supplement (PMC9364271)
Supplement: NIHMS1824571-supplement-Supplemental_Figures.pdf [file NIHMS1824571-supplement-Supplemental_Figures.pdf]

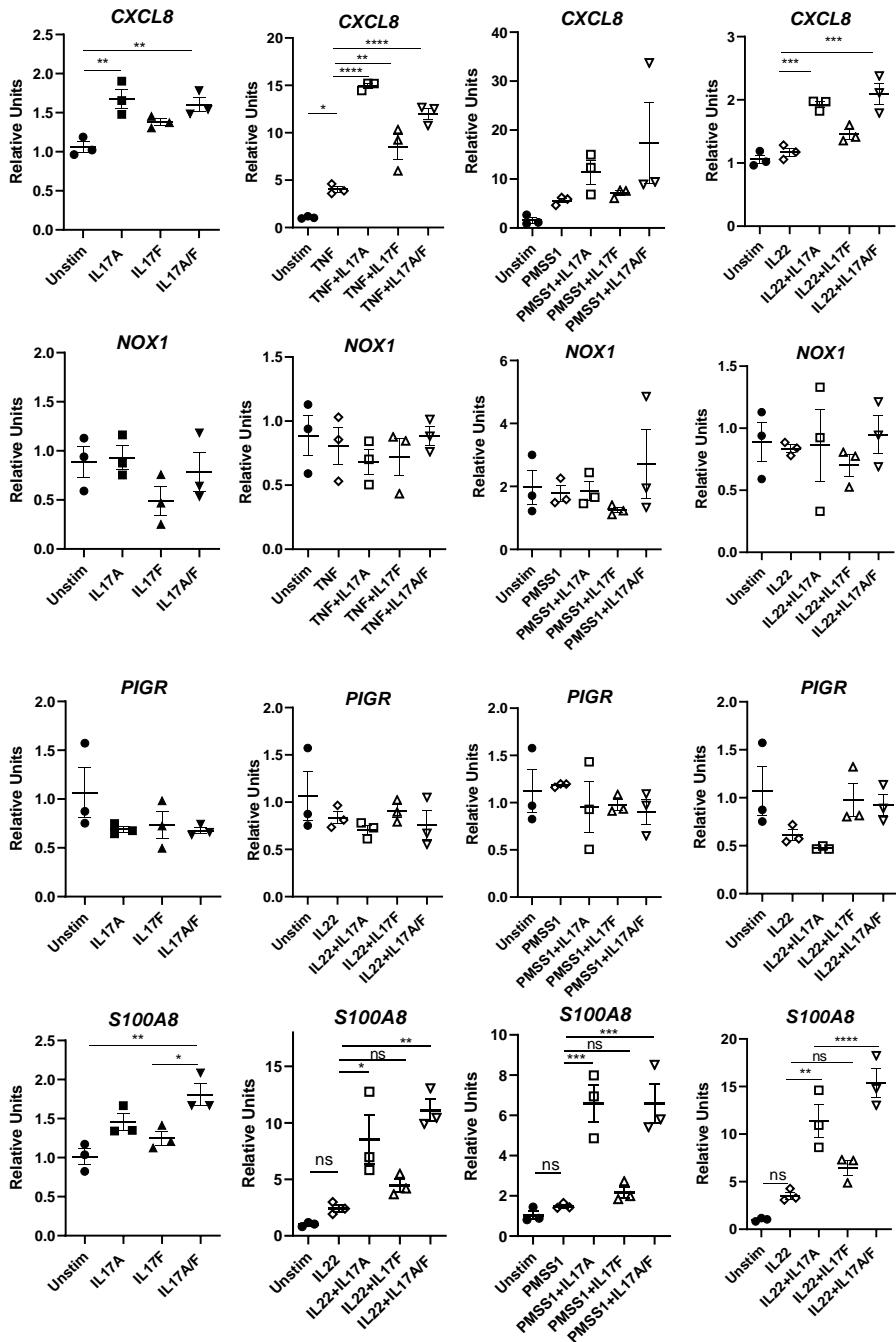

**Supplemental Figure 1.** MKN cell response to IL-17A, IL-17F or IL-17A/F. A. MKN cells were simulated with IL-17A, IL-17F or IL-17A/F (100ng/mL). B. Various stimuli (IL-17 cytokines and/or TNF $\alpha$  at 2ng/ml, IL-22 at 200ng/mL, or PMSS1 at an MOI of 50) were added to serum-starved MKN cells for 8 hours. qPCR was performed to measure expression of *CXCL8*, *S100A8*, *PIGR* and *NOX1* (Relative units and is relative to expression from cells treated with equal concentration of the carrier (BSA)). Data shown as  $\pm$  SEM and are representative of 2 independent experiments. Statistical analysis was performed with one-way ANOVA and Tukey's test for multiple comparisons.

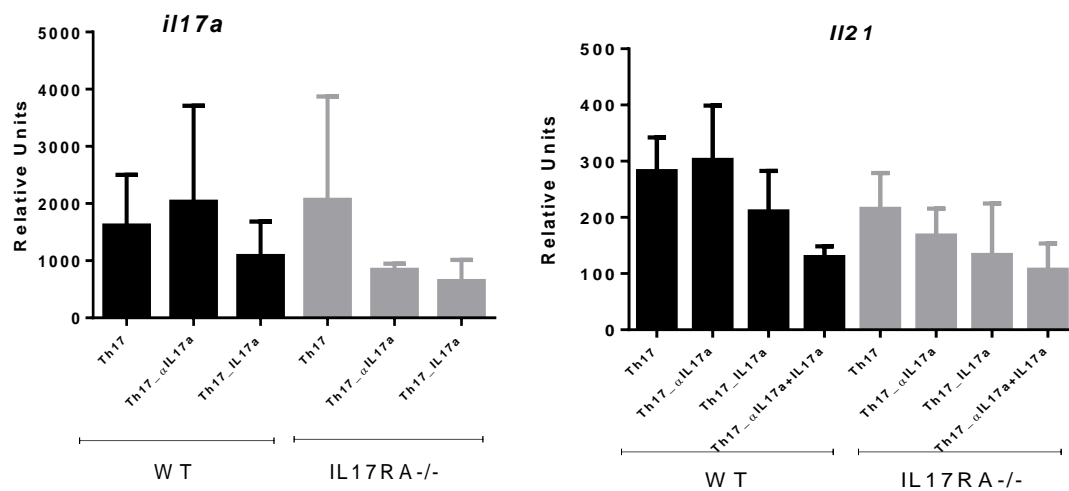

**Supplemental Figure 2.** In vitro Th17 differentiation assays do not suggest IL-17 impacts *il17a* and *Il21* expression. T cells were differentiated as described in the methods and then either anti-IL-17A (200 ng/ml) or rIL-17A (10 ng/ml) was added at 48 hrs. Gene expression was assessed by qPCR at 24 hours later.

Supplemental Table I. Nanostring (Ms\_Immunology Panel) was used to determine the Ratio and Log2Fold change of genes associated with innate lymphoid cells and myeloid cells in *Il17ra<sup>-/-</sup>* vs WT (C57BL/6J) gastric tissue at 3 months post infection with PMSS1 strain of *H. pylori*. Values highlighted in red were significantly different between genotypes.

### ILC Markers (innate lymphoid cells)

| ILC             | GENE                                          | % SAMPLES ABOVE THRESHOLD | RATIO | LOG2 FOLD CHANGE | P-VALUE    |
|-----------------|-----------------------------------------------|---------------------------|-------|------------------|------------|
|                 | <i>klrb1</i> (encodes NK1.1)                  | 0 %                       | -1.09 | -0.12            | 0.73608887 |
|                 | <i>Kit</i> (encodes CD117)                    | 100 %                     | 1.1   | 0.14             | 0.60356021 |
| <b>NK CELLS</b> | <i>Fcgr3</i><br>(encodes Fc Receptor gamma 3) | 100 %                     | 1.31  | 0.39             | 0.1695715  |
|                 | <i>Klrd1</i> (encodes CD94)                   | 100 %                     | -1.08 | -0.11            | 0.71743888 |
|                 | <i>Ncam1</i> (encodes CD56)                   | 100 %                     | -1.01 | -0.02            | 0.89048237 |

### Myeloid Cell Markers

| CELL TYPE              | GENE                            | % SAMPLES ABOVE THRESHOLD | RATIO  | LOG2 FOLD CHANGE | P-VALUE    |
|------------------------|---------------------------------|---------------------------|--------|------------------|------------|
| <b>NEUTROPHILS</b>     | <i>S100a8</i>                   | 100 %                     | -14.02 | -3.81            | 0.00169777 |
|                        | <i>S100a9</i>                   | 100 %                     | -5.5   | -2.46            | 0.00158813 |
| <b>MACROPHAGES</b>     | <i>Cd14</i>                     | 100 %                     | -1.33  | -0.41            | 0.23644663 |
|                        | <i>CD163</i>                    | 100 %                     | 1.03   | 0.05             | 0.787763   |
|                        | <i>Emr1</i>                     | 100 %                     | 1.41   | 0.49             | 0.02996789 |
|                        | <i>Itgam</i><br>(encodes CD11b) | 100 %                     | 1.27   | 0.35             | 0.04950276 |
| <b>DENDRITIC CELLS</b> | <i>Itgax</i><br>(encodes CD11c) | 100 %                     | 1.38   | 0.47             | 0.17926033 |
| <b>GENERAL MARKERS</b> | <i>Ccr2</i>                     | 100 %                     | 1.33   | 0.41             | 0.079329   |

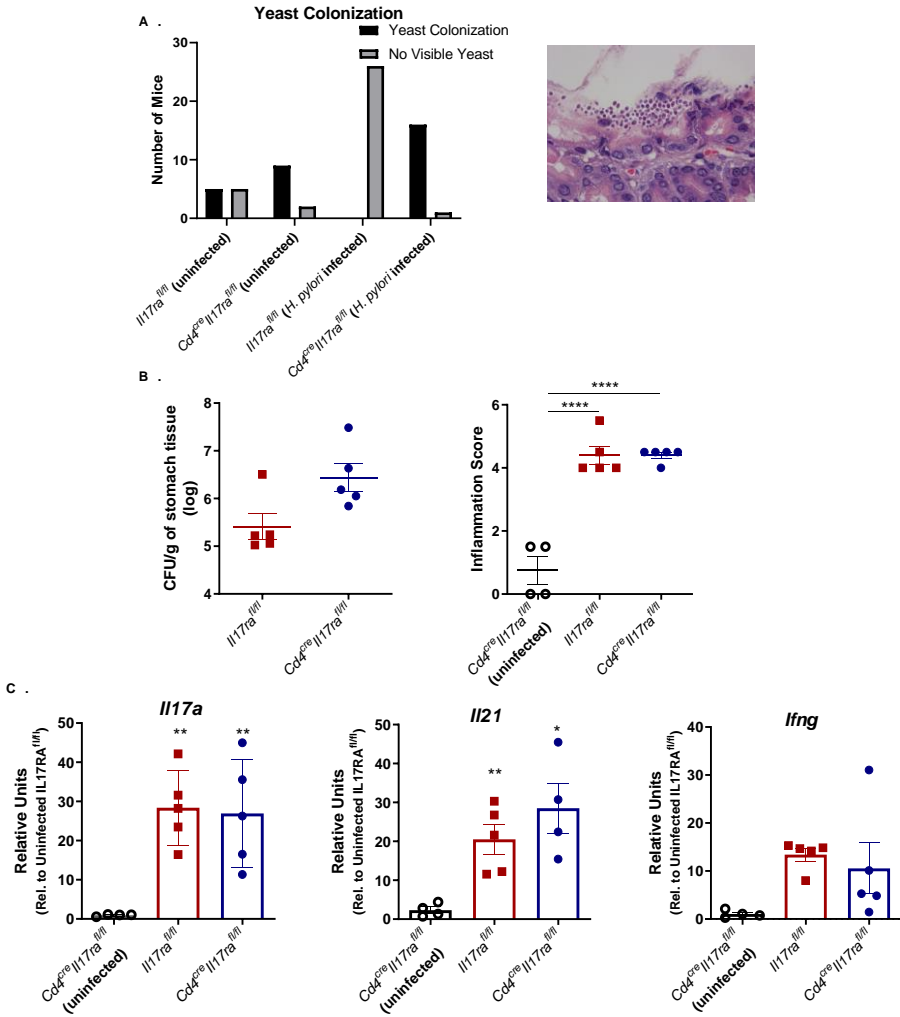

**Supplemental Figure 3.** In the presence of yeast colonization, IL-17RA expression on T cells is required to control bacterial burden but not required to control gastric inflammation in the mouse model. A) Yeast infection was visible much more frequently in *Cd4<sup>cre</sup>Il17ra<sup>fl/fl</sup>* than *Il17ra<sup>fl/fl</sup>*. When yeast was visible in *Il17ra<sup>fl/fl</sup>* (uninfected mice, 5) these were littermates of the *Cd4<sup>cre</sup>Il17ra<sup>fl/fl</sup>* mice. Yeast observed in the stomachs of a number of *Cd4<sup>cre</sup>Il17ra<sup>fl/fl</sup>* mice are pictured (based on morphology and literature search, the yeast may be *Kazachstania pintolopesii*). B) Bacterial burden was measured in *Il17ra<sup>fl/fl</sup>* (WT) and *Cd4<sup>cre</sup>Il17ra<sup>fl/fl</sup>* mice that were infected with PMSS1 for 3 months. CFU per gram of stomach was calculated and is presented  $\pm$ SEM. Statistical analysis was performed using Mann Whitney U unpaired t test on log transformed CFU/gram data. No significant differences between the groups of infected mice ( $p=0.056$ ). Total inflammation is presented. Statistical analysis was performed using Kruskal-Wallis test's and the Dunn's multiple comparisons test. Significantly more inflammation present compared to the uninfected controls (mean  $\pm$  SEM). C) qPCR was used to measure *Il21*, *Il17a* and *Ifng* transcripts in the gastric tissue of *H. pylori*-infected *Il17ra<sup>fl/fl</sup>* (WT) and *Cd4<sup>cre</sup>Il17ra<sup>fl/fl</sup>* mice. Relative units are calculated relative to *Gapdh* and calibrated to uninfected WT mice. Statistical analysis was performed using an ANOVA analysis and Tukey's multiple comparisons test. Error bars represent  $\pm$  SEM; \* $P \leq 0.05$ , \*\* $P \leq 0.01$  compared to the uninfected group.
